# Supplementary material for: Eating disorder symptomatology among transgender individuals: a systematic review and meta-analysis
Source: PubMed Central journal article supplement (PMC10214585; doi:10.1186/s40337-023-00806-y), 2023-05-26
Supplement: 40337_2023_806_MOESM2_ESM.pdf [file 40337_2023_806_MOESM2_ESM.pdf]

| <b>Author (year)</b>      | <b>Type of statistic reported</b> | <b>Excluded due to</b>             |
|---------------------------|-----------------------------------|------------------------------------|
| Jones et al. (2017)       | ED symptomatology                 | Not reporting scores on cisgenders |
| Ålgars et al. (2012)      | ED symptomatology                 | Not reporting scores on cisgenders |
| Duffy et al. (2021)       | ED symptomatology                 | Not reporting scores on cisgenders |
| Linsenmeyer et al. (2021) | ED symptomatology                 | Not reporting scores on cisgenders |
| Schvey et al. (2020)      | ED symptomatology                 | Not reporting scores on cisgenders |
| Mitchell et al. (2012)    | ED symptomatology                 | Not reporting scores on cisgenders |
| Cella et al. (2013)       | ED symptomatology                 | Not reporting standard deviations  |
| Hepp et al. (2005)        | Prevalence of ED                  | Not ED-specific assessment tool    |
| Mustanski et al. (2010)   | Prevalence of ED                  | Not ED-specific assessment tool    |
| Gómez-Gil et al. (2009)   | Prevalence of ED                  | Not ED-specific assessment tool    |
