# Supplementary material for: Eating disorder symptomatology among transgender individuals: a systematic review and meta-analysis
Source: PubMed Central journal article supplement (PMC10214585; doi:10.1186/s40337-023-00806-y), 2023-05-26
Supplement: 40337_2023_806_MOESM6_ESM.pdf [file 40337_2023_806_MOESM6_ESM.pdf]

# First meta-analysis

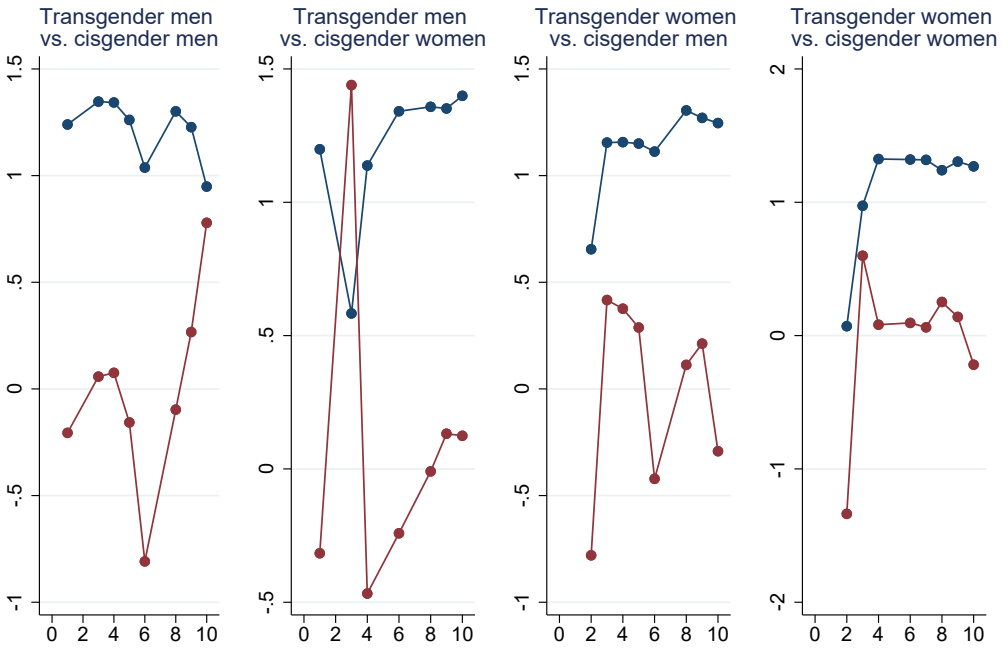

# Second meta-analysis

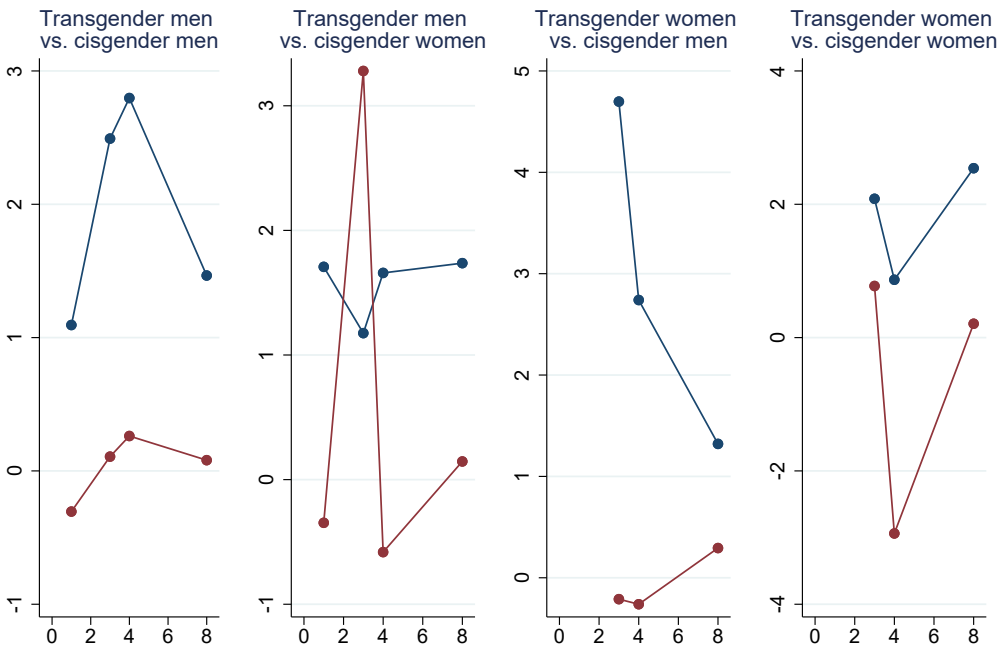

# Third meta-analysis

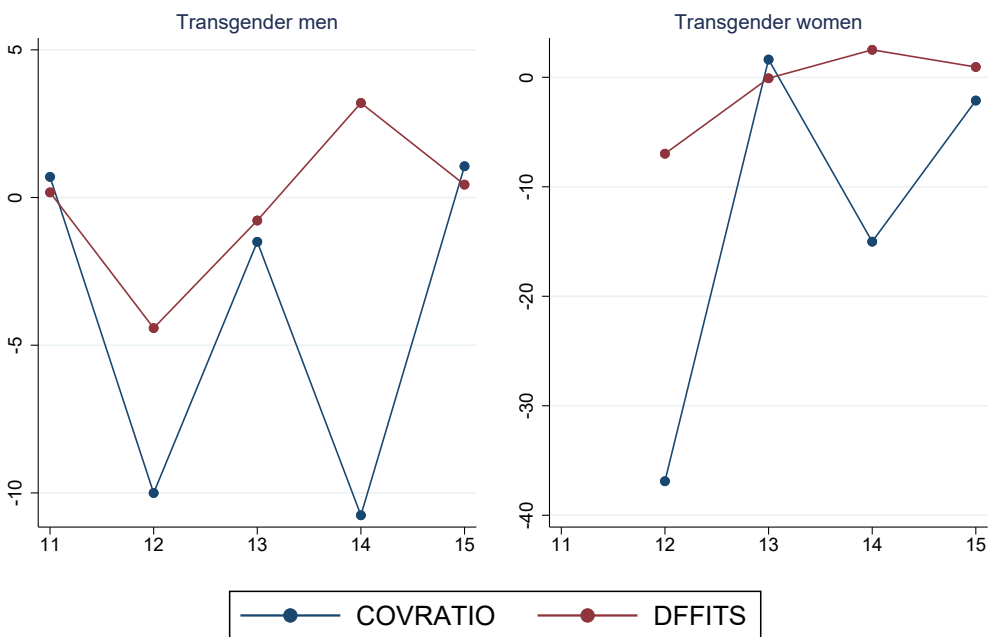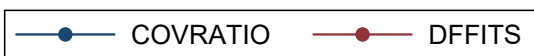

Note: The horizontal axes show the article ID
